# Supplementary material for: Effects of mannan oligosaccharides on growth performance, nutrient digestibility, ruminal fermentation and hematological parameters in sheep
Source: PeerJ. 2021 Jun 30;9:e11631. doi: 10.7717/peerj.11631 (PMC8254473; doi:10.7717/peerj.11631)
Supplement: Supplemental Information 1 [file peerj-09-11631-s001.xlsx]

## Sheet: Sheet1
treatment	initial weight	final weight	average daily gain		replicate	average daily intake
1	32.7	37.2	128.571		1	1.47778	1477.78
1	30.3	40	277.143		2	1.61389	1613.89
1	25.8	28.7	82.8571		1	1.64259	1642.59
1	30.3	35.7	154.286		2	1.52778	1527.78
1	34.9	40.4	157.143		1	1.62963	1629.63
1	32	36.4	125.714		2	1.60093	1600.93
1	28.7	38.1	268.571		2	1.23333	1233.33
1	33	41.1	231.429		1	1.4537	1453.7
1	28.9	38.8	282.857		2	1.70185	1701.85
1	32.5	39.3	194.286		1	1.72222	1722.22
1	28.7	34.1	154.286		2	1.56759	1567.59
1	29.5	37	214.286		1	1.64537	1645.37
1	29.3	35.7	182.857		3	1.46389	1463.89
1	25.1				4	1.48796	1487.96
1	35.3	43.4	231.429		3	1.60093	1600.93
1	33.6	41.1	214.286		4	1.53796	1537.96
1	29.3	39.5	291.429		3	1.47593	1475.93
1	26.5	35.3	251.429		4	1.61574	1615.74
1	35.2	41.1	168.571		4	1.66389	1663.89
1	32	42.1	288.571		3	1.55926	1559.26
1	32.1	41	254.286		4	1.41944	1419.44
1	29.8				3	1.57222	1572.22
1	30.3	37.1	194.286		4	1.15648	1156.48
1	33.8	41.1	208.571		3	1.67263	1672.63
2	34.5	43.4	254.286
2	31.4	39.1	220
2	29.6	30.4	22.8571
2	26.8	34.7	225.714
2	30.8	39	234.286
2	31.7	39.7	228.571
2	28.9	34.4	157.143
2	32.2	37.4	148.571
2	37	45.1	231.429
2	27.5	35.5	228.571
2	33	37.9	140
2	30.6	35.2	131.429
2	31.5	39.4	225.714
2	33.1
2	33.7	36.6	82.8571
2	28.1	32.3	120
2	35.6	45.6	285.714
2	30.9	38.3	211.429
2	24.1	31.6	214.286
2	32	41.6	274.286
2	33.4	41.5	231.429
2	30.8	37.7	197.143
2	30.7	35	122.857
2	29.5	36.6	202.857
3	37	44.8	222.857
3	30.2	36.1	168.571
3	26.5	31.9	154.286
3	32.5	40	214.286
3	32	41.7	277.143
3	32.5	39.7	205.714
3	31.5	34.8	94.2857
3	30	36.8	194.286
3	30.1	41.7	331.429
3	29.9
3	34.6	42.6	228.571
3	29.1	37.4	237.143
3	31.1	38.5	211.429
3	28.3	34.2	168.571
3	32.2	36	108.571
3	31.5
3	30.5	33.6	88.5714
3	33	43.4	297.143
3	30.8	40.5	277.143
3	28.3	37.9	274.286
3	31.4	40.2	251.429
3	34.5	44.2	277.143
3	31.2	38.2	200
3
4	31.5	34.4	82.8571
4	31.5	42.3	308.571
4	35.2	36.5	37.1429
4	26.2	37.2	314.286
4	35.1	40.7	160
4	28.7	35.5	194.286
4	30.9	35.4	128.571
4	31.8	36.6	137.143
4	33.9	41.6	220
4	29.1	39.6	300
4	34.3
4	28.7	36.6	225.714
4	37.5	45.4	225.714
4	30.5	41.4	311.429
4	26.8	41	405.714
4	31.2	39.4	234.286
4	35.7	40.8	145.714
4	31.3	39.7	240
4	30.1
4	29.5	40.3	308.571
4	29.4	32.4	85.7143
4	28.5	36.2	220
4	29.5	37.2	220
4	33.1
