# Supplementary material for: Effects of mannan oligosaccharides on growth performance, nutrient digestibility, ruminal fermentation and hematological parameters in sheep
Source: PeerJ. 2021 Jun 30;9:e11631. doi: 10.7717/peerj.11631 (PMC8254473; doi:10.7717/peerj.11631)
Supplement: Supplemental Information 2 [file peerj-09-11631-s002.xlsx]

## Sheet: Sheet1
treatment	DM intake	DM in feces	digested DM	digestibility	OM intake	OM in feces	digested OM	digestibility	ash intake	ash in feces	digested ash	digestibility	NDF intake	NDF in feces	digested NDF	digestibility	ADF intake	ADF in feces	digested ADF	digestibility	CP intake	CP in feces	CP in urine	digested CP	digestibility	retained CP	retention rate	Ca intake	Ca in feces	digested Ca	digestibility	TP intake	TP infeces	digested TP	digestibility
1	1273.47	431.42	842.05	66.12	1162.81	355.02	807.79	69.47	110.66	76.4	34.26	30.96	367.98	214.03	153.96	41.84	178.64	124.17	54.47	30.49	228.36	76.8	125.06	151.55	66.37	26.49	11.6	6.23	6.19	0.04	0.62	5.05	4.72	0.32	6.41
1	1151.87	362.31	789.56	68.55	1051.78	290.9	760.88	72.34	100.09	71.41	28.68	28.65	332.85	189.08	143.76	43.19	161.59	114	47.59	29.45	206.55	62.55	83.91	144	69.71	60.09	29.09	5.64	5.26	0.38	6.73	4.56	3.41	1.16	25.33
1	955.91	318.1	637.81	66.72	872.84	264.35	608.49	69.71	83.06	53.74	29.32	35.3	276.22	165.04	111.18	40.25	134.1	95.33	38.76	28.91	171.41	53.92	80.65	117.49	68.54	36.84	21.49	4.68	4.9	-0.22	-4.71	3.79	3.09	0.7	18.48
1	1083.21	332.14	751.07	69.34	989.08	272.78	716.3	72.42	94.12	59.35	34.77	36.94	313.01	170.73	142.28	45.45	151.95	100.75	51.21	33.7	194.24	56.72	81.84	137.52	70.8	55.68	28.67	5.3	5.09	0.21	3.9	4.29	3.41	0.88	20.57
1	1565.76	500.68	1065.08	68.02	1429.7	425.97	1003.73	70.21	136.06	74.7	61.35	45.09	452.44	269.73	182.72	40.38	219.65	156.97	62.68	28.54	280.77	83.57	68.05	197.2	70.23	129.14	46	7.66	6.31	1.35	17.66	6.2	4.29	1.91	30.78
1	677.41	262.72	414.68	61.22	618.54	214.64	403.91	65.3	58.86	48.09	10.78	18.31	195.74	125.42	70.33	35.93	95.03	72.93	22.1	23.25	121.47	46.44	38.58	75.03	61.77	36.45	30	3.31	4.31	-1	-30.03	2.68	2.67	0.01	0.41
2	916.94	312.43	604.5	65.93	838.35	261.98	576.38	68.75	78.58	50.45	28.13	35.79	259.6	160.13	99.47	38.32	127.16	91.89	35.27	27.74	165.6	56.52	72.87	109.08	65.87	36.22	21.87	4.17	4.56	-0.39	-9.25	3.42	3.17	0.25	7.2
2	1245.18	381.31	863.87	69.38	1138.47	322.52	815.95	71.67	106.71	58.79	47.93	44.91	352.53	204.43	148.09	42.01	172.68	116.14	56.53	32.74	224.88	66.75	83.6	158.13	70.32	74.54	33.14	5.67	5.41	0.26	4.62	4.64	2.93	1.71	36.85
2	1203.93	355.62	848.31	70.46	1100.76	295.31	805.45	73.17	103.18	60.32	42.86	41.54	340.85	170.03	170.82	50.12	166.96	98.73	68.22	40.86	217.43	77.86	79.16	139.58	64.19	60.41	27.78	5.48	5.28	0.2	3.65	4.49	3.34	1.15	25.56
2	976.25	337.94	638.31	65.38	892.59	286.57	606.02	67.9	83.66	51.38	32.29	38.59	276.39	175.65	100.74	36.45	135.38	99.08	36.3	26.81	176.31	61.24	47.27	115.08	65.27	67.81	38.46	4.44	4.53	-0.08	-1.87	3.64	3.11	0.53	14.57
2	1355.42	384.1	971.32	71.66	1239.26	321.8	917.46	74.03	116.16	62.29	53.87	46.37	383.74	190.42	193.32	50.38	187.96	109.4	78.57	41.8	244.79	73.32	69.06	171.47	70.05	102.4	41.83	6.17	5.81	0.36	5.8	5.05	3.59	1.46	28.99
2	1655.38	483.44	1171.94	70.8	1513.51	410.18	1103.33	72.9	141.87	73.25	68.61	48.36	468.66	253.17	215.49	45.98	229.56	148.36	81.2	35.37	298.97	82.75	87.59	216.21	72.32	128.62	43.02	7.53	6.61	0.93	12.34	6.17	4.1	2.07	33.6
3	1194.38	349.31	845.07	70.75	1097.89	297.42	800.47	72.91	96.49	51.89	44.6	46.22	356.1	174.69	181.4	50.94	174.46	101.97	72.49	41.55	216.59	66.42	107.8	150.17	69.33	42.37	19.56	5.67	4.6	1.06	18.76	4.39	3.5	0.9	20.37
3	415.38	112.19	303.19	72.99	381.82	87.88	293.94	76.98	33.56	24.31	9.24	27.55	123.84	52.73	71.11	57.42	60.67	32.09	28.58	47.11								1.97	2.42	-0.45	-22.78	1.53	1.95	-0.42	-27.78
3	1558	485.92	1072.08	68.81	1432.14	408.56	1023.59	71.47	125.86	77.36	48.5	38.53	464.51	262.02	202.48	43.59	227.57	149.28	78.29	34.4	282.53	80.66	113.94	201.87	71.45	87.94	31.12	7.39	7.39	0	0.02	5.73	4.54	1.19	20.85
3	1334.65	399.8	934.85	70.04	1226.84	339.66	887.18	72.31	107.82	60.15	47.67	44.21	397.92	207.82	190.1	47.77	194.95	119.84	75.11	38.53	242.03	73.81	77.29	168.21	69.5	90.93	37.57	6.33	5.36	0.98	15.43	4.91	3.42	1.49	30.32
3	937.62	248.09	689.52	73.54	861.87	202.64	659.24	76.49	75.74	45.46	30.29	39.99	279.54	130.58	148.97	53.29	136.95	76.35	60.6	44.25	170.03	41.1	78.35	128.93	75.83	50.58	29.75	4.45	4.86	-0.41	-9.32	3.45	2.91	0.54	15.55
3	1176.67	283.33	893.34	75.92	1081.62	237.96	843.66	78	95.06	45.37	49.68	52.27	350.82	141.41	209.41	59.69	171.87	82.71	89.16	51.88	213.38	53.97	58.16	159.41	74.71	101.25	47.45	5.58	4.23	1.35	24.23	4.33	2.79	1.53	35.46
4	1087.81	318.54	769.27	70.72	1004.64	262.94	741.71	73.83	83.17	55.6	27.57	33.14	282.16	166.39	115.77	41.03	142.56	98.8	43.77	30.7	194.21	54.04	53.4	140.17	72.17	86.77	44.68	5.36	4.44	0.92	17.18	4.22	2.53	1.69	40.06
4	1107.56	330.14	777.42	70.19	1022.88	269.55	753.33	73.65	84.68	60.59	24.09	28.45	287.28	176.85	110.43	38.44	145.15	105.77	39.38	27.13	197.74	55.35	89.39	142.39	72.01	53.01	26.81	5.45	5.48	-0.02	-0.46	4.3	3.23	1.07	24.8
4	1088	369.34	718.66	66.05	1004.82	304.09	700.72	69.74	83.18	65.25	17.94	21.56	282.21	182.83	99.38	35.21	142.59	108.42	34.17	23.96	194.25	59.25	85.77	135	69.5	49.23	25.34	5.36	5.83	-0.47	-8.78	4.22	3.73	0.49	11.58
4	1528.83	418.51	1110.32	72.63	1411.94	343.65	1068.29	75.66	116.89	74.86	42.03	35.96	396.55	233.93	162.63	41.01	200.36	138.96	61.4	30.64	272.95	67.01	97.56	205.94	75.45	108.38	39.71	7.53	6.17	1.36	18.02	5.93	3.73	2.2	37.13
4	1376.38	417.82	958.55	69.64	1271.15	345.52	925.63	72.82	105.23	72.3	32.93	31.29	357.01	213.55	143.46	40.18	180.38	124.88	55.5	30.77	245.73	75.46	105.4	170.27	69.29	64.88	26.4	6.78	6.35	0.43	6.31	5.34	4.08	1.26	23.57
4	1439.59	441.94	997.65	69.3	1329.53	367.4	962.12	72.37	110.06	74.53	35.53	32.28	373.41	227.89	145.52	38.97	188.66	135.12	53.54	28.38	257.02	73.86	113.06	183.16	71.26	70.1	27.27	7.09	6.64	0.44	6.27	5.59	3.96	1.62	29.09
