# Supplementary material for: Effects of mannan oligosaccharides on growth performance, nutrient digestibility, ruminal fermentation and hematological parameters in sheep
Source: PeerJ. 2021 Jun 30;9:e11631. doi: 10.7717/peerj.11631 (PMC8254473; doi:10.7717/peerj.11631)
Supplement: Supplemental Information 3 [file peerj-09-11631-s003.xlsx]

## Sheet: Sheet1
treatment	total SCFAs	acetate	propionate	butyrate	iso-butyrate	iso-valerate	valerate	C2/C3	ammonia
1	71.71	62.32	19.02	12.08	1.75545	3.56155	1.2675	3.28	27.1128
1	50.54	66.53	14.15	12.52	2.03224	3.5574	1.21013	4.7	25.8643
1	48.18	56.31	20.59	17.21	1.54932	2.67145	1.66949	2.73	25.5341
1	50.95	62.91	17.43	11.86	2.26355	4.13224	1.40963	3.61	28.4851
1	37.71	60.19	16.27	14.45	2.58531	4.97117	1.53015	3.7	38.8137
1	42.45	64.47	18.17	12.8	1.35372	2.38818	0.820795	3.55	26.0515
2	48.04	65.76	14.94	14.24	1.67513	2.53908	0.841214	4.4	19.0168
2	48.55	64.83	14.94	14.41	1.73602	3.03661	1.05366	4.34	18.6142
2	22.21	61.81	17.06	11.91	3.25142	4.46242	1.51112	3.62	18.1978
2	28.82	65.42	16.17	10.08	2.58173	4.19287	1.55487	4.04	20.2409
2	48.49	68.19	16.37	8.9	2.11302	3.36749	1.0612	4.17	29.032
2	35.46	65.03	16.85	12.2	1.84623	2.96121	1.11034	3.86	19.5606
3	46.86	64.5	17.83	12.06	1.86547	2.78004	0.959951	3.62	18.9638
3	29.13	64.82	15.28	16.18	1.14609	1.46295	1.10525	4.24	14.9373
3	20.91	60.25	18.26	9.11	3.73372	6.7572	1.88789	3.3	26.1363
3	87.71	62.47	15.49	16.96	1.5767	2.47713	1.02168	4.03	28.4035
3	33.68	63.41	13.77	18.85	0.994352	2.26138	0.721144	4.61	15.3397
3	39.34	63.62	17.35	13.13	1.90114	2.85619	1.13987	3.67	14.9379
4	72.57	66.79	12.9	15.58	1.14678	2.78881	0.787215	5.18	25.5642
4	28.6	62.48	20.77	9.81	2.23405	3.01122	1.69777	3.01	14.4823
4	18.89	65.14	19.45	8.22	2.54213	3.54613	1.0978	3.35	11.4497
4	58.98	61.1	12.54	22.63	0.985614	2.0248	0.716515	4.87	21.8031
4	49.27	65.01	17.47	11.73	1.87734	2.59562	1.30944	3.72	16.3922
4	32.34	62.94	16.34	13.11	2.36551	3.94946	1.30051	3.85	20.6433
