# Supplementary material for: Effects of mannan oligosaccharides on growth performance, nutrient digestibility, ruminal fermentation and hematological parameters in sheep
Source: PeerJ. 2021 Jun 30;9:e11631. doi: 10.7717/peerj.11631 (PMC8254473; doi:10.7717/peerj.11631)
Supplement: Supplemental Information 4 [file peerj-09-11631-s004.xlsx]

## Sheet: Sheet1
treatment	WBC	RBC	HGB	HCT	MCV	MCH	MCHC	RDW	PLT	MPV	PDW	PCT
1	224	14.32	146	48.5	33.9	10.1	301	14.5	571	4.9	16.4	0.28
1	201.1	14.59	148	47.5	32.6	10.1	311	16.1	675	4.9	16.1	0.33
1	168.7	13.39	142	48.7	36.4	10.6	291	14.2	1131	4.5	15.8	0.51
1	169.2	13.59	138	44.8	33	10.1	308	13.9	661	4.9	16.1	0.32
1	214.1	12.49	139	46.4	37.2	11.1	299	15.2	746	4.8	15.9	0.36
1	165	10.97	109	37.7	34.4	9.9	289	16.1	1034	5.3	16.3	0.55
2	230.6	14.02	147	47.6	34	10.4	308	14.5	1150	4.6	15.6	0.53
2	143.8	13.55	129	40.6	30	9.5	317	15.4	575	4.7	16.1	0.27
2	217.3	14.18	143	46.5	32.8	10	307	15	870	4.4	15.6	0.38
2	192.3	13.93	145	47.7	34.3	10.4	303	15.1	1403	4.4	15.8	0.62
2	209.4	15.37	146	48.8	31.8	9.4	299	15.5	751	4.7	16.1	0.35
2	244.9	13.94	144	46.2	33.2	10.3	311	17.2	1692	4.6	15.7
3	183.3	13.19	130	40.3	30.6	9.8	322	16.1	648	5.5	16.2	0.36
3	221.6	13.87	136	43.8	31.6	9.8	310	13.8	1150	4.8	16	0.55
3	118.3	11.89	121	41.3	34.8	10.1	292	14.6	832	4.5	15.7	0.37
3	164.5	14.12	141	48	34	9.9	293	16.1	751	4.3	15.6	0.32
3	230.8	15.13	152	47.9	31.7	10	317	15.5	1215	4.4	15.5	0.53
3	217.9	13.3	139	43.4	32.7	10.4	320	15.6	819	4.9	16	0.4
4
4	215.3	12.31	141	42.9	34.9	11.4	328	14.6	654	5	16.2	0.33
4	214.1	13.88	153	47.4	34.2	11	322	15.6	1322	4.5	15.5	0.59
4	155.9	11.37	109	34.7	30.6	9.5	314	15.5	633	4.7	16.1	0.3
4	195.9	14.74	149	46.2	31.4	10.1	322	14.9	482	4.7	16.3	0.23
4	135.7	13.59	141	46.7	34.4	10.3	301	15.1	654	4.8	16	0.31
